# Supplementary material
Source: Springer Nature journal article supplement (https://www.springermedizin.de/resource/supplementary/12936_2009_955_MOESM1_ESM.pdf/9548620)

**Malaria**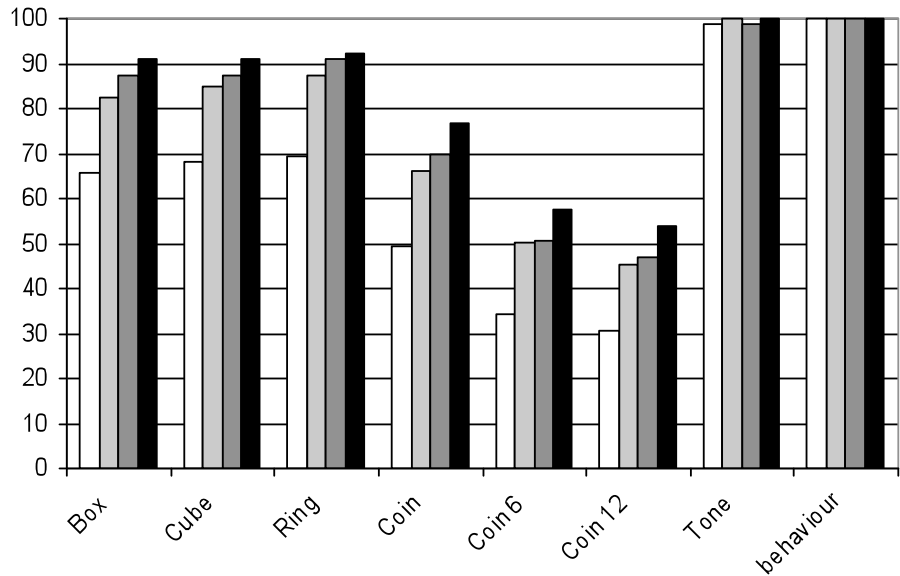**Controls**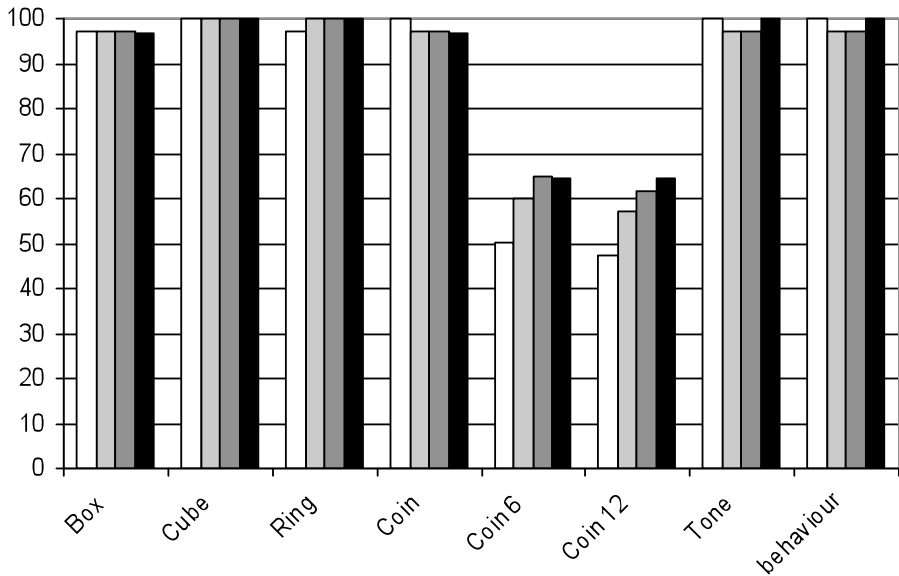

Supplement: MOESM1 [file 9548620]
